# Supplementary material for: Genome-resolved correlation mapping links microbial community structure to metabolic interactions driving methane production from wastewater
Source: PubMed Central journal article supplement (PMC10477309; doi:10.1038/s41467-023-40907-5), 2023-09-04
Supplement: 41467_2023_40907_MOESM14_ESM.pdf [file 41467_2023_40907_MOESM14_ESM.pdf]

## Reporting Summary

Nature Portfolio wishes to improve the reproducibility of the work that we publish. This form provides structure for consistency and transparency in reporting. For further information on Nature Portfolio policies, see our [Editorial Policies](#) and the [Editorial Policy Checklist](#).

### Statistics

For all statistical analyses, confirm that the following items are present in the figure legend, table legend, main text, or Methods section.

n/a Confirmed

- |                                     |                                     |                                                                                                                                                                                                                                                            |
|-------------------------------------|-------------------------------------|------------------------------------------------------------------------------------------------------------------------------------------------------------------------------------------------------------------------------------------------------------|
| <input type="checkbox"/>            | <input checked="" type="checkbox"/> | The exact sample size ( $n$ ) for each experimental group/condition, given as a discrete number and unit of measurement                                                                                                                                    |
| <input type="checkbox"/>            | <input checked="" type="checkbox"/> | A statement on whether measurements were taken from distinct samples or whether the same sample was measured repeatedly                                                                                                                                    |
| <input type="checkbox"/>            | <input checked="" type="checkbox"/> | The statistical test(s) used AND whether they are one- or two-sided<br><i>Only common tests should be described solely by name; describe more complex techniques in the Methods section.</i>                                                               |
| <input checked="" type="checkbox"/> | <input type="checkbox"/>            | A description of all covariates tested                                                                                                                                                                                                                     |
| <input type="checkbox"/>            | <input checked="" type="checkbox"/> | A description of any assumptions or corrections, such as tests of normality and adjustment for multiple comparisons                                                                                                                                        |
| <input type="checkbox"/>            | <input checked="" type="checkbox"/> | A full description of the statistical parameters including central tendency (e.g. means) or other basic estimates (e.g. regression coefficient) AND variation (e.g. standard deviation) or associated estimates of uncertainty (e.g. confidence intervals) |
| <input type="checkbox"/>            | <input checked="" type="checkbox"/> | For null hypothesis testing, the test statistic (e.g. $F$ , $t$ , $r$ ) with confidence intervals, effect sizes, degrees of freedom and $P$ value noted<br><i>Give <math>P</math> values as exact values whenever suitable.</i>                            |
| <input checked="" type="checkbox"/> | <input type="checkbox"/>            | For Bayesian analysis, information on the choice of priors and Markov chain Monte Carlo settings                                                                                                                                                           |
| <input checked="" type="checkbox"/> | <input type="checkbox"/>            | For hierarchical and complex designs, identification of the appropriate level for tests and full reporting of outcomes                                                                                                                                     |
| <input type="checkbox"/>            | <input checked="" type="checkbox"/> | Estimates of effect sizes (e.g. Cohen's $d$ , Pearson's $r$ ), indicating how they were calculated                                                                                                                                                         |

*Our web collection on [statistics for biologists](#) contains articles on many of the points above.*

### Software and code

Policy information about [availability of computer code](#)

Data collection

Data analysis

For manuscripts utilizing custom algorithms or software that are central to the research but not yet described in published literature, software must be made available to editors and reviewers. We strongly encourage code deposition in a community repository (e.g. GitHub). See the Nature Portfolio [guidelines for submitting code & software](#) for further information.

### Data

Policy information about [availability of data](#)

All manuscripts must include a [data availability statement](#). This statement should provide the following information, where applicable:

- Accession codes, unique identifiers, or web links for publicly available datasets
- A description of any restrictions on data availability
- For clinical datasets or third party data, please ensure that the statement adheres to our [policy](#)

BioProject PRJNA902729 as BioSamples SAMN32228586 - SAMN32228684. For whole-genome shotgun metagenome sequences, reference the JGI GOLD database under IMG study Gs0127566, with sequencing project IDs Gp0293654, Gp0293652, Gp0293653, Gp0293650, Gp0293651, Gp0293648, Gp0293649, Gp0293647, Gp0406093, Gp0406094, Gp0406085, Gp0406096, Gp0406083, Gp0406099, Gp0406100, Gp0406104, Gp0406081 (See Table S3 for details). For mRNA shotgun metatranscript sequences, reference the NCBI SRA database under BioProject PRJNA902729 as BioSamples SAMN34106045 - SAMN34106058. For the code used to conduct statistical analysis and create data visualizations in R v4.1.2, reference the accompanying file "lulu\_microbes\_viz.Rmd".

## Research involving human participants, their data, or biological material

Policy information about studies with [human participants or human data](#). See also policy information about [sex, gender \(identity/presentation\), and sexual orientation](#) and [race, ethnicity and racism](#).

|                                                                    |     |
|--------------------------------------------------------------------|-----|
| Reporting on sex and gender                                        | N/A |
| Reporting on race, ethnicity, or other socially relevant groupings | N/A |
| Population characteristics                                         | N/A |
| Recruitment                                                        | N/A |
| Ethics oversight                                                   | N/A |

Note that full information on the approval of the study protocol must also be provided in the manuscript.

## Field-specific reporting

Please select the one below that is the best fit for your research. If you are not sure, read the appropriate sections before making your selection.

Life sciences  Behavioural & social sciences  Ecological, evolutionary & environmental sciences

For a reference copy of the document with all sections, see [nature.com/documents/nr-reporting-summary-flat.pdf](https://www.nature.com/documents/nr-reporting-summary-flat.pdf)

## Life sciences study design

All studies must disclose on these points even when the disclosure is negative.

|                 |     |
|-----------------|-----|
| Sample size     | N/A |
| Data exclusions | N/A |
| Replication     | N/A |
| Randomization   | N/A |
| Blinding        | N/A |

## Behavioural & social sciences study design

All studies must disclose on these points even when the disclosure is negative.

|                   |     |
|-------------------|-----|
| Study description | N/A |
| Research sample   | N/A |
| Sampling strategy | N/A |
| Data collection   | N/A |
| Timing            | N/A |
| Data exclusions   | N/A |
| Non-participation | N/A |
| Randomization     | N/A |

## Ecological, evolutionary & environmental sciences study design

All studies must disclose on these points even when the disclosure is negative.

|                                   |                                                                                                                                                                                                                                                                                                                                                                                                                                                                                                                                                                                                                                                                                                                                                                                       |
|-----------------------------------|---------------------------------------------------------------------------------------------------------------------------------------------------------------------------------------------------------------------------------------------------------------------------------------------------------------------------------------------------------------------------------------------------------------------------------------------------------------------------------------------------------------------------------------------------------------------------------------------------------------------------------------------------------------------------------------------------------------------------------------------------------------------------------------|
| Study description                 | A 2-year time series study was conducted in a full-scale wastewater treatment plant anaerobic digester (AD) to determine microbiome composition in relation to physicochemistry and biogas production across 4 sample groups. Data generated represented 1) the physicochemical state of the AD material and 2) the microbial community taxonomic and function composition at specific timepoints. Samples were delineated into 4 groups spanning 52 samples taken throughout the 2-year study (16 for Standard Operation I, 10 for Chemically Enhanced Pretreated Operation, 11 for Standard Operation II, and 6 for Serial Operation). Statistical analysis to determine whether these 4 Operations selected for distinct microbial communities was conducted in a pairwise manner. |
| Research sample                   | Physical samples were taken from activated sludge material within the AD tank in order to understand the metabolic and chemical processes occurring within. These samples were roughly 50mL and meant to represent the whole AD tank (>10,000 L). Sampling size was constrained by the port available to sample from. Datasets generated from this sample were numerical matrices and DNA/RNA sequences describing the samples.                                                                                                                                                                                                                                                                                                                                                       |
| Sampling strategy                 | Activated sludge was collected from a sampling port on the side of an anaerobic digester by wastewater treatment plant operators. Sample size was precalculated from an estimate of microbial biomass concentration (cells/mL) and based on the amount of material needed to perform physicochemical assays. The sample size chosen is within the range of standard samples taken from environmental matrices for microbial community analysis.                                                                                                                                                                                                                                                                                                                                       |
| Data collection                   | Physicochemical data were collected from samples by plant operators using industry-standard assays. DNA/RNA sequence data were generated by short-read Illumina sequencing technologies.                                                                                                                                                                                                                                                                                                                                                                                                                                                                                                                                                                                              |
| Timing and spatial scale          | Samples were taken between Oct 13th, 2016 and August 1, 2018, approximately every 2 weeks. Samples were removed from the AD tank by a sampling port near the bottom of the tank (the same spatial location each time).                                                                                                                                                                                                                                                                                                                                                                                                                                                                                                                                                                |
| Data exclusions                   | Some data were obtained from a second digester, but these samples did not encompass the entire time series and were excluded                                                                                                                                                                                                                                                                                                                                                                                                                                                                                                                                                                                                                                                          |
| Reproducibility                   | Each sample had 3 biological replicates which were sampled one after the other (from the same port) on each sampling day. These replicates were treated independently during analysis. Spanning 2 years, the study reproduced each season twice.                                                                                                                                                                                                                                                                                                                                                                                                                                                                                                                                      |
| Randomization                     | There was 1 AD tank and 1 sampling port available, so no spatial randomization was done. There are no co-variates to account for in the study because the intent was to sample the same location at constant intervals to determine its properties.                                                                                                                                                                                                                                                                                                                                                                                                                                                                                                                                   |
| Blinding                          | Blinding was not relevant for this study.                                                                                                                                                                                                                                                                                                                                                                                                                                                                                                                                                                                                                                                                                                                                             |
| Did the study involve field work? | <input type="checkbox"/> Yes <input checked="" type="checkbox"/> No                                                                                                                                                                                                                                                                                                                                                                                                                                                                                                                                                                                                                                                                                                                   |

### Field work, collection and transport

|                        |     |
|------------------------|-----|
| Field conditions       | N/A |
| Location               | N/A |
| Access & import/export | N/A |
| Disturbance            | N/A |

### Reporting for specific materials, systems and methods

We require information from authors about some types of materials, experimental systems and methods used in many studies. Here, indicate whether each material, system or method listed is relevant to your study. If you are not sure if a list item applies to your research, read the appropriate section before selecting a response.

## Materials &amp; experimental systems

|                                     |                                                        |
|-------------------------------------|--------------------------------------------------------|
| n/a                                 | Involvement in the study                               |
| <input checked="" type="checkbox"/> | <input type="checkbox"/> Antibodies                    |
| <input checked="" type="checkbox"/> | <input type="checkbox"/> Eukaryotic cell lines         |
| <input checked="" type="checkbox"/> | <input type="checkbox"/> Palaeontology and archaeology |
| <input checked="" type="checkbox"/> | <input type="checkbox"/> Animals and other organisms   |
| <input checked="" type="checkbox"/> | <input type="checkbox"/> Clinical data                 |
| <input checked="" type="checkbox"/> | <input type="checkbox"/> Dual use research of concern  |
| <input checked="" type="checkbox"/> | <input type="checkbox"/> Plants                        |

## Methods

|                                     |                                                 |
|-------------------------------------|-------------------------------------------------|
| n/a                                 | Involvement in the study                        |
| <input checked="" type="checkbox"/> | <input type="checkbox"/> ChIP-seq               |
| <input checked="" type="checkbox"/> | <input type="checkbox"/> Flow cytometry         |
| <input checked="" type="checkbox"/> | <input type="checkbox"/> MRI-based neuroimaging |

## Antibodies

|                 |     |
|-----------------|-----|
| Antibodies used | N/A |
| Validation      | N/A |

## Eukaryotic cell lines

Policy information about [cell lines and Sex and Gender in Research](#)

|                                                                      |     |
|----------------------------------------------------------------------|-----|
| Cell line source(s)                                                  | N/A |
| Authentication                                                       | N/A |
| Mycoplasma contamination                                             | N/A |
| Commonly misidentified lines<br>(See <a href="#">ICLAC</a> register) | N/A |

## Palaeontology and Archaeology

|                                                                                                                                                 |     |
|-------------------------------------------------------------------------------------------------------------------------------------------------|-----|
| Specimen provenance                                                                                                                             | N/A |
| Specimen deposition                                                                                                                             | N/A |
| Dating methods                                                                                                                                  | N/A |
| <input type="checkbox"/> Tick this box to confirm that the raw and calibrated dates are available in the paper or in Supplementary Information. |     |
| Ethics oversight                                                                                                                                | N/A |

Note that full information on the approval of the study protocol must also be provided in the manuscript.

## Animals and other research organisms

Policy information about [studies involving animals; ARRIVE guidelines](#) recommended for reporting animal research, and [Sex and Gender in Research](#)

|                         |     |
|-------------------------|-----|
| Laboratory animals      | N/A |
| Wild animals            | N/A |
| Reporting on sex        | N/A |
| Field-collected samples | N/A |
| Ethics oversight        | N/A |

Note that full information on the approval of the study protocol must also be provided in the manuscript.

## Clinical data

Policy information about [clinical studies](#)

All manuscripts should comply with the ICMJE [guidelines for publication of clinical research](#) and a completed [CONSORT checklist](#) must be included with all submissions.

|                             |                                  |
|-----------------------------|----------------------------------|
| Clinical trial registration | <input type="text" value="N/A"/> |
| Study protocol              | <input type="text" value="N/A"/> |
| Data collection             | <input type="text" value="N/A"/> |
| Outcomes                    | <input type="text" value="N/A"/> |

## Dual use research of concern

Policy information about [dual use research of concern](#)

### Hazards

Could the accidental, deliberate or reckless misuse of agents or technologies generated in the work, or the application of information presented in the manuscript, pose a threat to:

| No                                  | Yes                                                 |
|-------------------------------------|-----------------------------------------------------|
| <input checked="" type="checkbox"/> | <input type="checkbox"/> Public health              |
| <input checked="" type="checkbox"/> | <input type="checkbox"/> National security          |
| <input checked="" type="checkbox"/> | <input type="checkbox"/> Crops and/or livestock     |
| <input checked="" type="checkbox"/> | <input type="checkbox"/> Ecosystems                 |
| <input checked="" type="checkbox"/> | <input type="checkbox"/> Any other significant area |

### Experiments of concern

Does the work involve any of these experiments of concern:

| No                                  | Yes                                                                                                  |
|-------------------------------------|------------------------------------------------------------------------------------------------------|
| <input checked="" type="checkbox"/> | <input type="checkbox"/> Demonstrate how to render a vaccine ineffective                             |
| <input checked="" type="checkbox"/> | <input type="checkbox"/> Confer resistance to therapeutically useful antibiotics or antiviral agents |
| <input checked="" type="checkbox"/> | <input type="checkbox"/> Enhance the virulence of a pathogen or render a nonpathogen virulent        |
| <input checked="" type="checkbox"/> | <input type="checkbox"/> Increase transmissibility of a pathogen                                     |
| <input checked="" type="checkbox"/> | <input type="checkbox"/> Alter the host range of a pathogen                                          |
| <input checked="" type="checkbox"/> | <input type="checkbox"/> Enable evasion of diagnostic/detection modalities                           |
| <input checked="" type="checkbox"/> | <input type="checkbox"/> Enable the weaponization of a biological agent or toxin                     |
| <input checked="" type="checkbox"/> | <input type="checkbox"/> Any other potentially harmful combination of experiments and agents         |

## Plants

|                       |                                  |
|-----------------------|----------------------------------|
| Seed stocks           | <input type="text" value="N/A"/> |
| Novel plant genotypes | <input type="text" value="N/A"/> |
| Authentication        | <input type="text" value="N/A"/> |

## ChIP-seq

### Data deposition

- Confirm that both raw and final processed data have been deposited in a public database such as [GEO](#).
- Confirm that you have deposited or provided access to graph files (e.g. BED files) for the called peaks.

|                                                                    |                                  |
|--------------------------------------------------------------------|----------------------------------|
| Data access links<br><i>May remain private before publication.</i> | <input type="text" value="N/A"/> |
|--------------------------------------------------------------------|----------------------------------|

Files in database submission Genome browser session  
(e.g. [UCSC](#)) 

## Methodology

Replicates Sequencing depth Antibodies Peak calling parameters Data quality Software 

## Flow Cytometry

### Plots

Confirm that:

- The axis labels state the marker and fluorochrome used (e.g. CD4-FITC).
- The axis scales are clearly visible. Include numbers along axes only for bottom left plot of group (a 'group' is an analysis of identical markers).
- All plots are contour plots with outliers or pseudocolor plots.
- A numerical value for number of cells or percentage (with statistics) is provided.

### Methodology

Sample preparation Instrument Software Cell population abundance Gating strategy  Tick this box to confirm that a figure exemplifying the gating strategy is provided in the Supplementary Information.

## Magnetic resonance imaging

### Experimental design

Design type Design specifications Behavioral performance measures 

### Acquisition

Imaging type(s) Field strength Sequence & imaging parameters Area of acquisition Diffusion MRI  Used  Not used

## Preprocessing

|                            |     |
|----------------------------|-----|
| Preprocessing software     | N/A |
| Normalization              | N/A |
| Normalization template     | N/A |
| Noise and artifact removal | N/A |
| Volume censoring           | N/A |

## Statistical modeling & inference

|                                                                                                                                 |     |
|---------------------------------------------------------------------------------------------------------------------------------|-----|
| Model type and settings                                                                                                         | N/A |
| Effect(s) tested                                                                                                                | N/A |
| Specify type of analysis: <input type="checkbox"/> Whole brain <input type="checkbox"/> ROI-based <input type="checkbox"/> Both |     |
| Statistic type for inference                                                                                                    | N/A |
| (See <a href="#">Eklund et al. 2016</a> )                                                                                       |     |
| Correction                                                                                                                      | N/A |

## Models & analysis

|                                               |                                                                       |
|-----------------------------------------------|-----------------------------------------------------------------------|
| n/a                                           | Involvement in the study                                              |
| <input type="checkbox"/>                      | <input type="checkbox"/> Functional and/or effective connectivity     |
| <input type="checkbox"/>                      | <input type="checkbox"/> Graph analysis                               |
| <input type="checkbox"/>                      | <input type="checkbox"/> Multivariate modeling or predictive analysis |
| Functional and/or effective connectivity      | N/A                                                                   |
| Graph analysis                                | N/A                                                                   |
| Multivariate modeling and predictive analysis | N/A                                                                   |
