# Supplementary material for: Genome-resolved correlation mapping links microbial community structure to metabolic interactions driving methane production from wastewater
Source: PubMed Central journal article supplement (PMC10477309; doi:10.1038/s41467-023-40907-5), 2023-09-04
Supplement: 41467_2023_40907_MOESM16_ESM.pdf [file 41467_2023_40907_MOESM16_ESM.pdf]

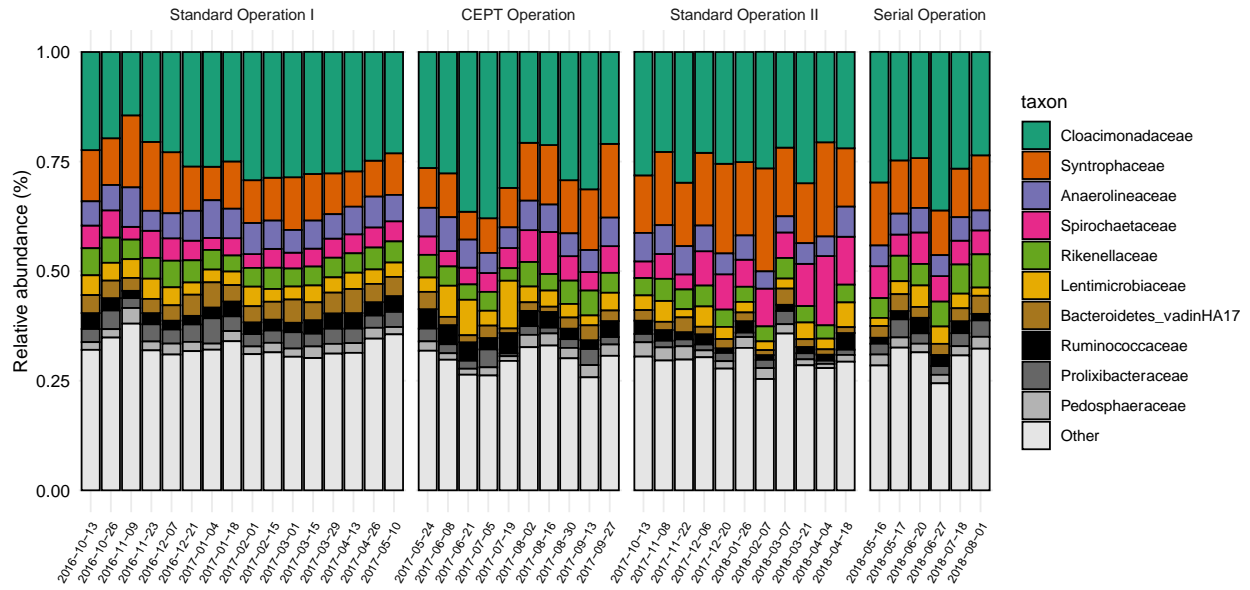

**Fig. S1.** AD microbial community composition at family-level taxonomic groupings for all sampling dates along the time-series. Replicate samples for each date are averaged, and the relative abundances of all ASVs within a given family are summed.

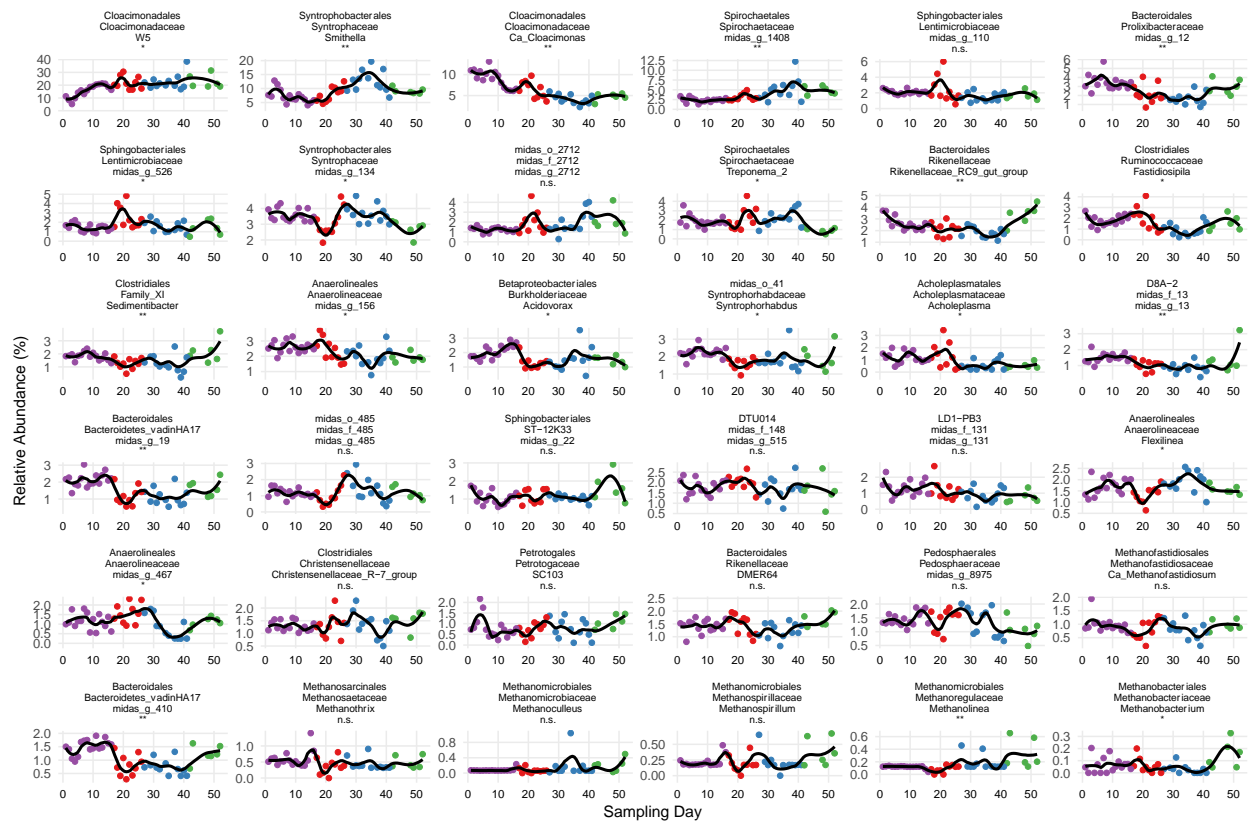

**Fig. S2.** The relative abundances of genus-level taxa across the time-series. All ASVs within each genus are summed. The y-axis represents sample number (1-52) – date and sample name information can be found in Supplemental Table S1. Points are samples colored by configuration (violet = SOI, red = CEPT, blue = SOII, green = SER). Each graph facet includes the order, family, and genus name, and whether a two-sided ANOVA test determined that the genus had differential abundance between configurations (n.s. = not significant, \* =  $p < 0.05$ , \*\* =  $p < 0.01$ , \*\*\* =  $p < 0.001$ ).

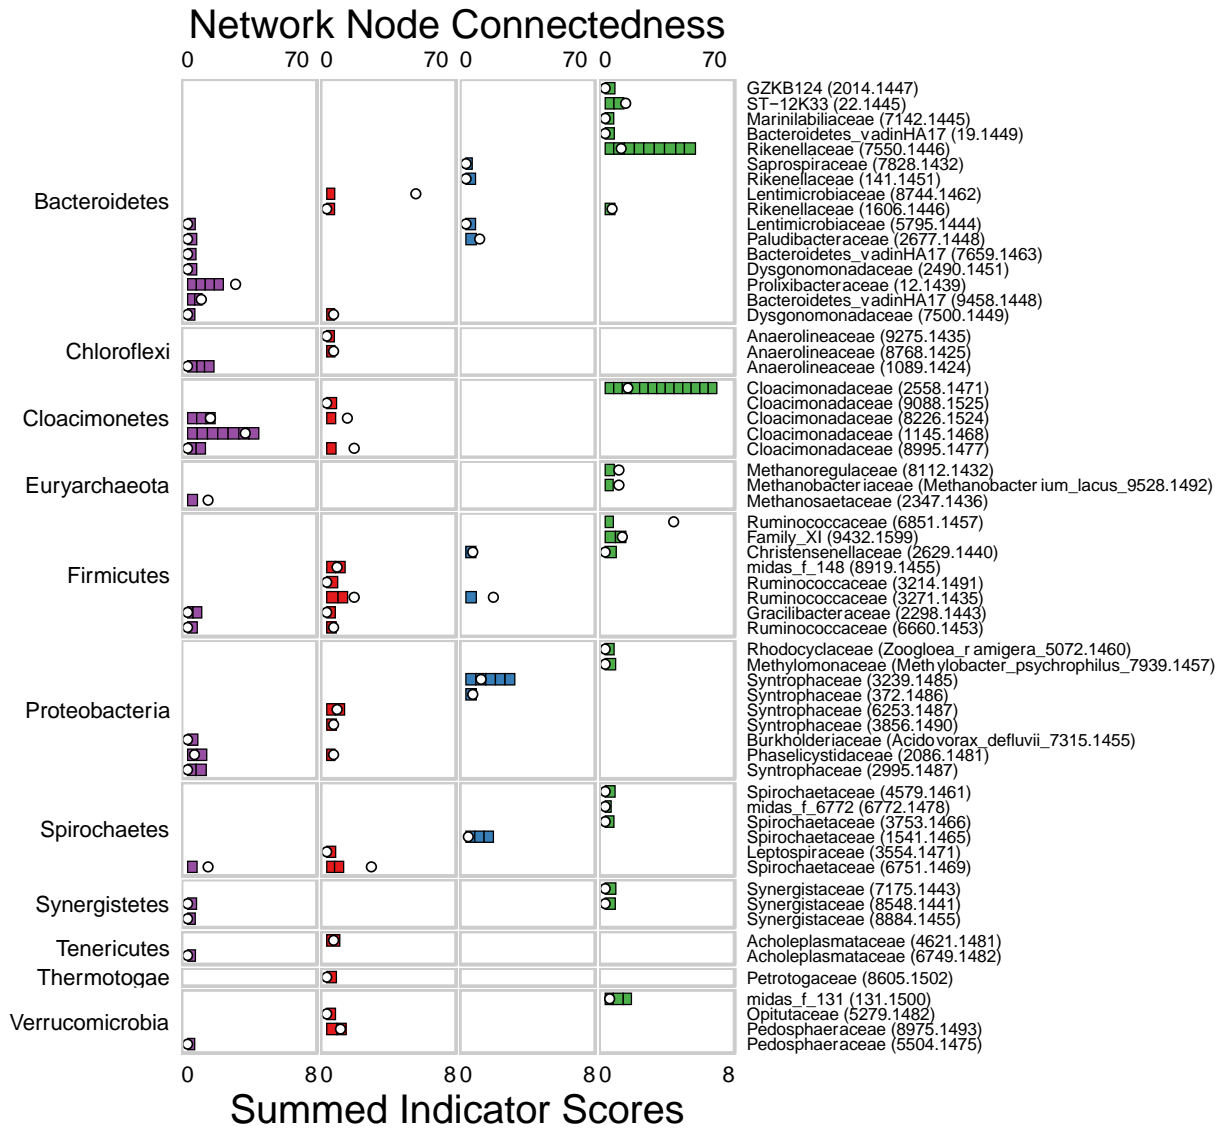

**Fig. S3.** Indicator ASVs are shown as individual boxes, faceted by the configuration that they are indicators for (left to right: violet = SOI, red = CEPT, blue = SOII, green = SER). Each ASV box is in a row which indicates its family-level taxonomy (and MIDAS ID) on the right axis and its phylum-level taxonomy on the left axis. The bottom x-axis shows the summed and individual multi-pattern-level analysis score for indicator ASVs and the top x-axis shows the summed network connectedness of indicator ASVs from each family (see Methods and Figure 4).



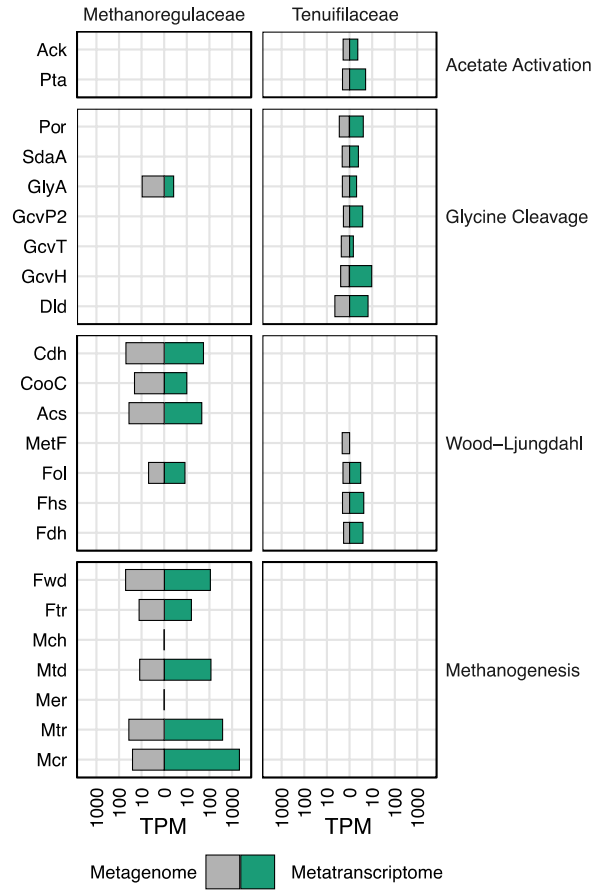

**Fig. S5.** TPM values from metagenomic and metatranscriptomic read mapping to select genes in the Subnetwork 1 MAGs from Methanoregulaceae (3300036947\_39) and Tenuifilaceae (3300028576\_27). TPM values and other genomic features are available in Table S11.
